# Supplementary material
Source: PubMed Central journal article supplement (PMC8578432)
Supplement: NIHMS1741439-supplement-1.pdf [file NIHMS1741439-supplement-1.pdf]

## Supplemental Figure 1

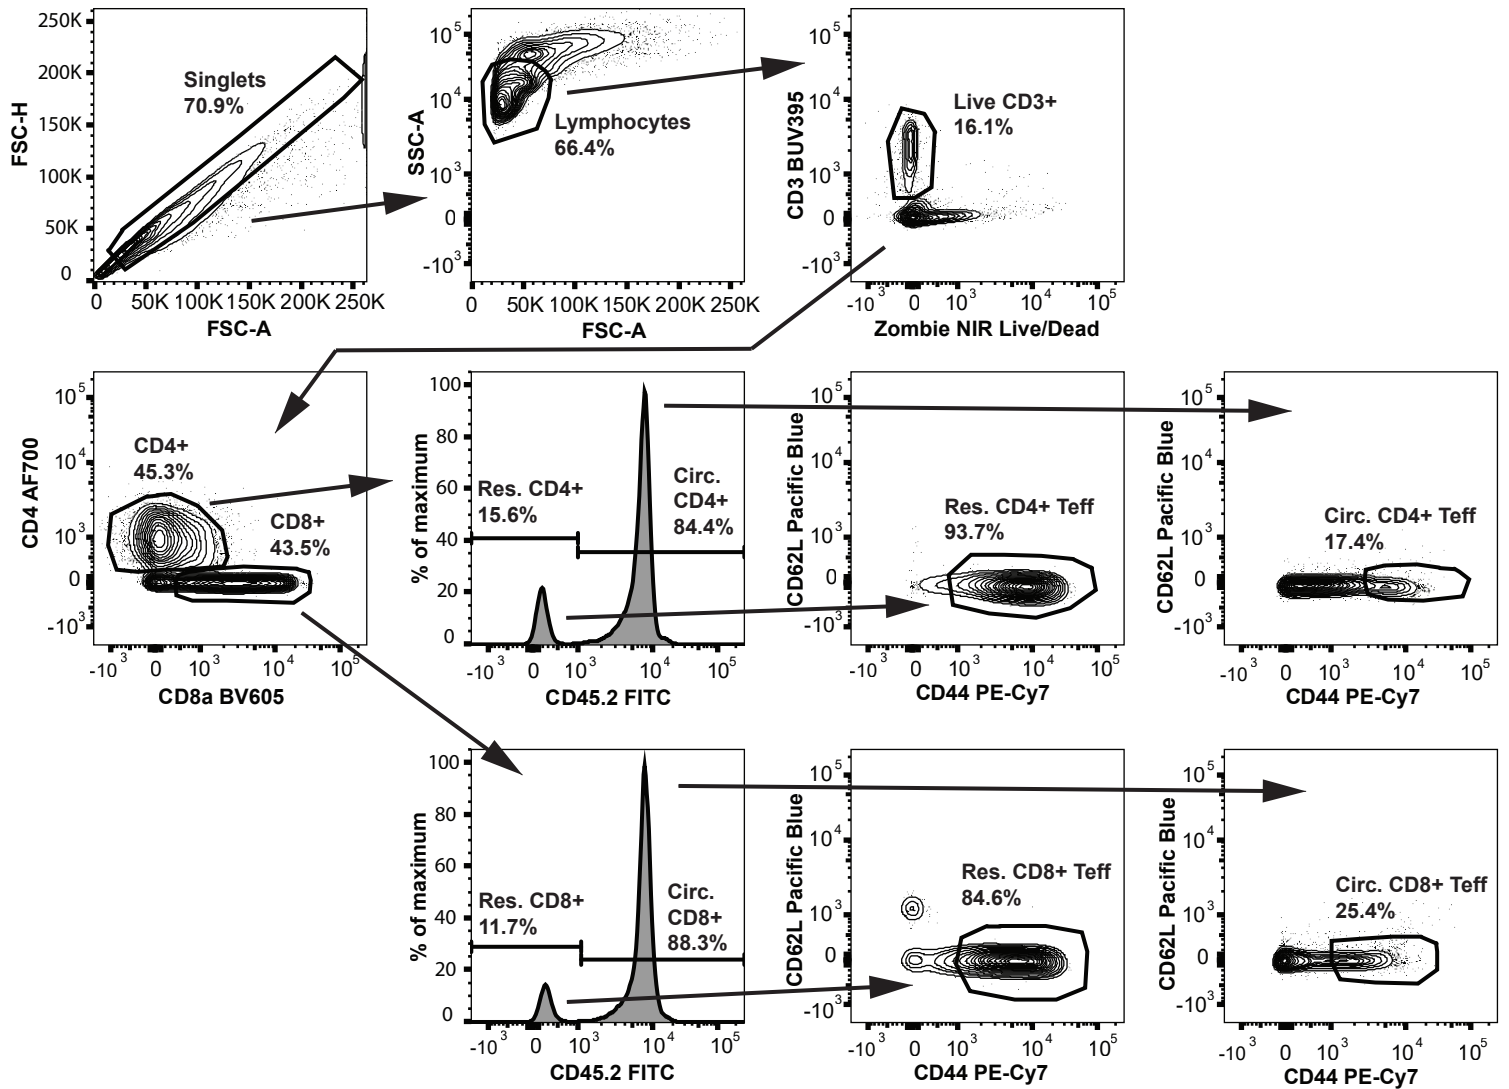

**Supplemental Figure 1. Gating scheme.** Representative gating scheme for quantifying resident and circulating CD4+ and CD8+ Teff cells.

# Supplemental Figure 2

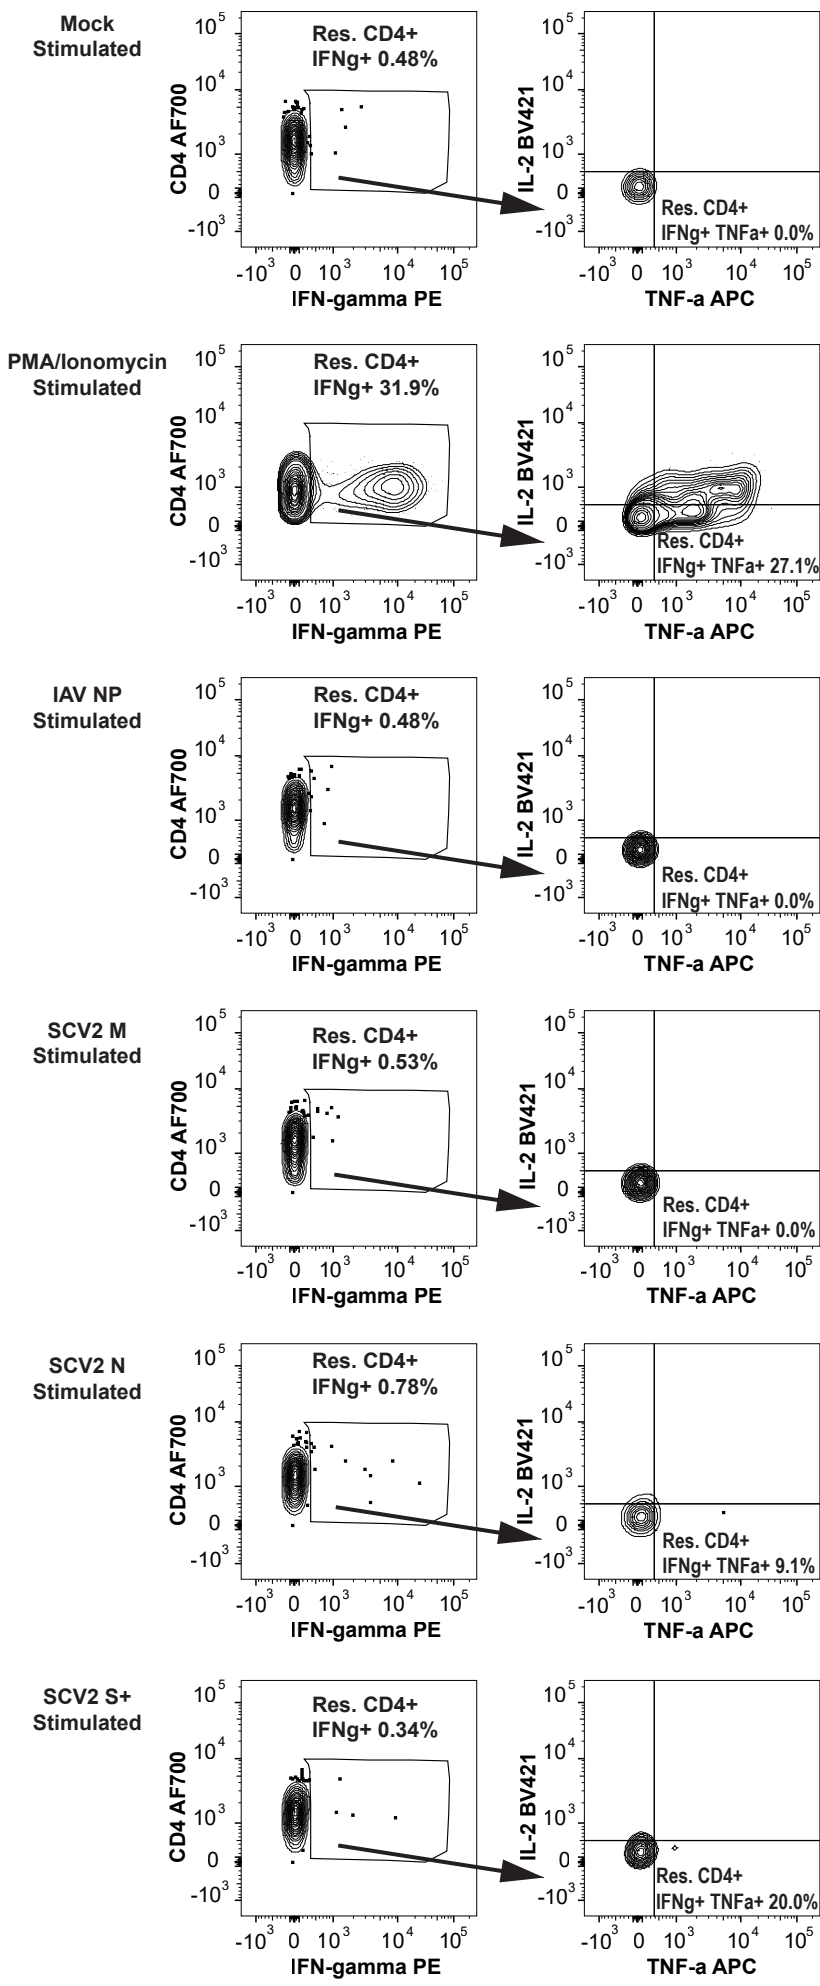

**Supplemental Figure 2. ICS gating scheme.** Representative gating scheme for quantifying cytokine responses by resident and circulating CD4+ and CD8+ T cells following stimulation. Resident and circulating CD4+ and CD8+ T cells were gated on as in Supplemental Fig. 1. Mock, PMA/Ionomycin, IAV NP, SCV2 M, SCV2 N, and SCV2 S+ stimulations are shown for resident CD4+ T cells to illustrate how all intracellular cytokine data was analyzed.

### Supplemental Figure 3

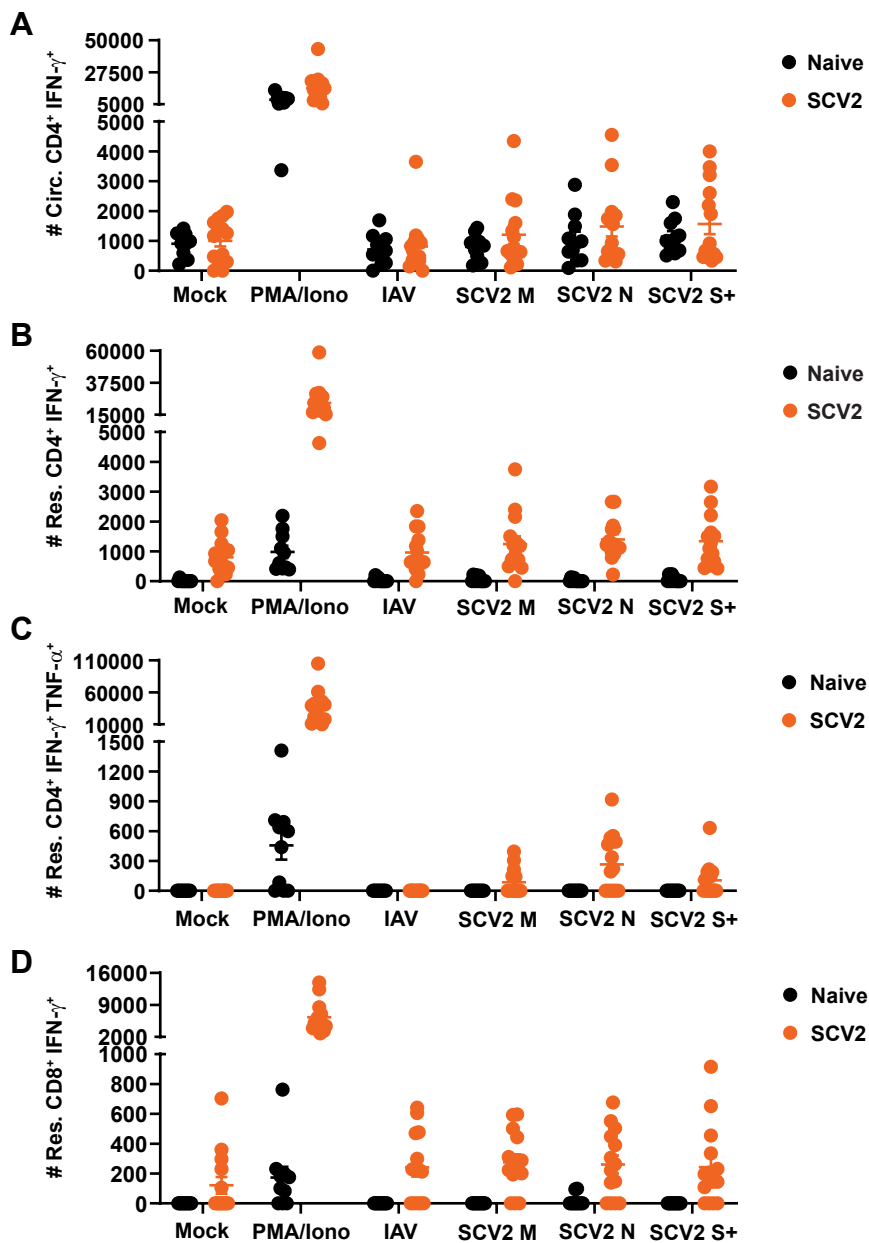

**Supplemental Figure 3. Resident and circulating T cells are specific for multiple SCV2 antigens and respond to non-specific stimulation.** hACE2 mice were intranasally infected with  $10^2$  PFU of SARS-CoV-2. Uninfected mice served as negative controls. Twenty-eight days later, lung cells were mock stimulated, stimulated with PMA/Ionomycin, or IAV NP, SCV2 M, SCV2 N, or SCV2 S+ peptide pools. The production of A) IFN- $\gamma$  by circulating CD4<sup>+</sup> T cells, B) IFN- $\gamma$  by resident CD4<sup>+</sup> T cells, C) IFN- $\gamma$  and TNF- $\alpha$  by resident CD4<sup>+</sup> T cells, and D) IFN- $\gamma$  by resident CD8<sup>+</sup> T cells was determined by flow cytometry. n=10-14 mice/group and are combined from 3 independent experiments. Each point represents an individual mouse; error bars indicate SEM.
